# Supplementary material
Source: PubMed Central journal article supplement (PMC7122131)

Supplemental Figure S1

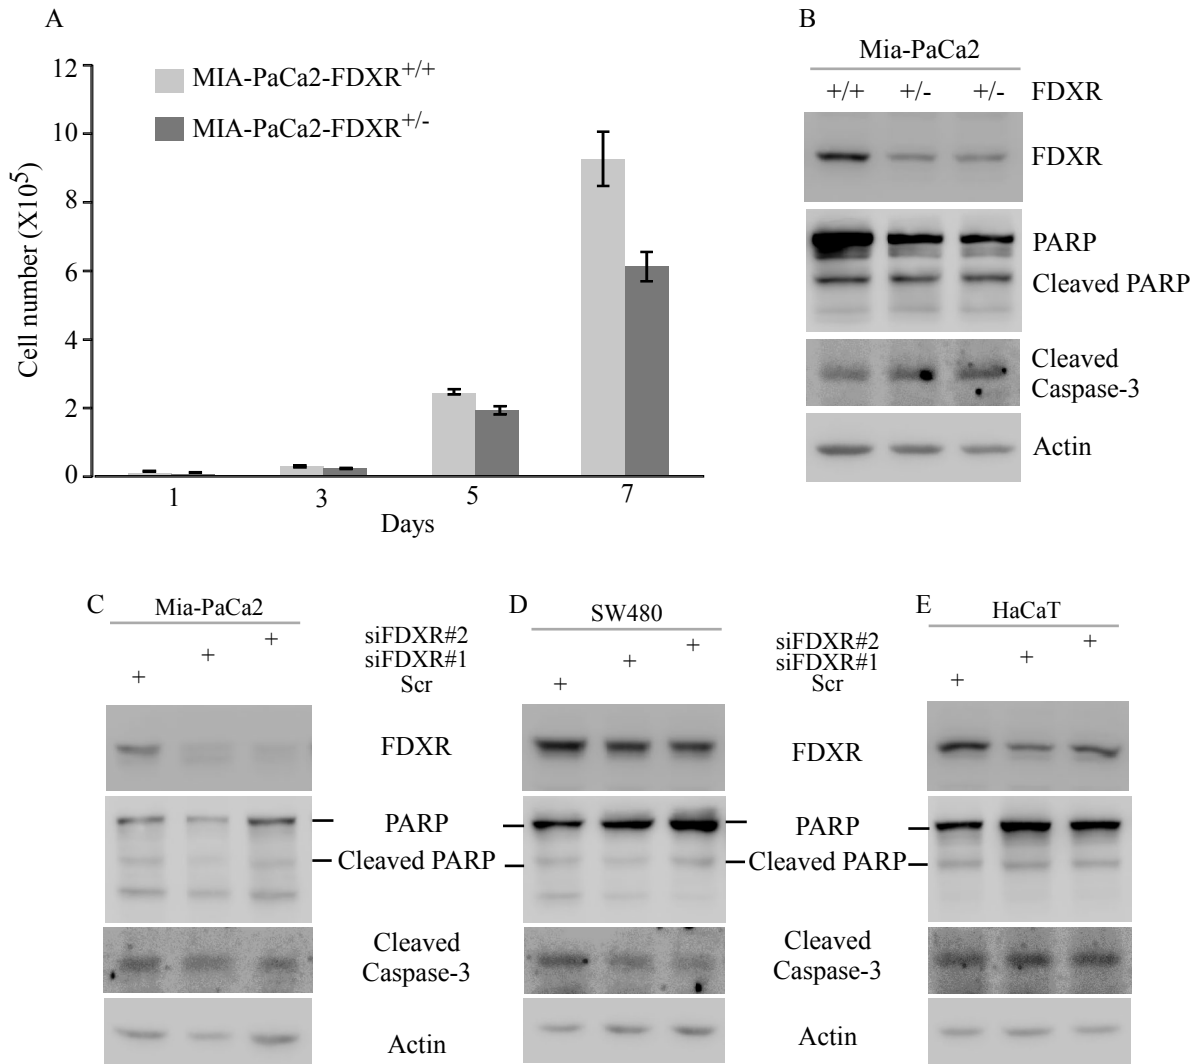

Supplement: NIHMS1561094-supplement-Supplemental_Figure_S1.pdf [file NIHMS1561094-supplement-Supplemental_Figure_S1.pdf]

Supplemental Figure S2

A

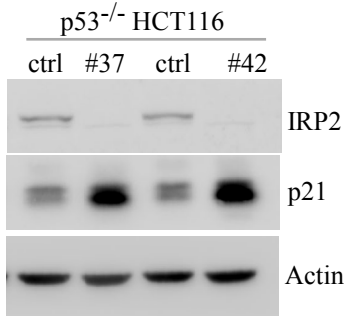

B

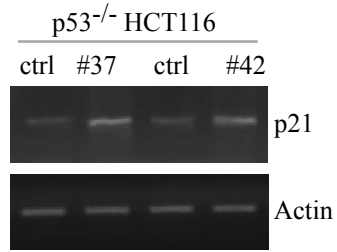

C

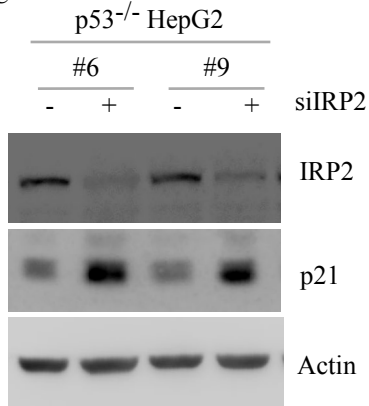

D

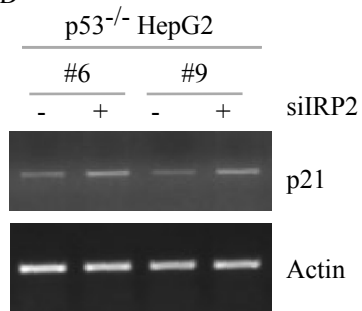

E

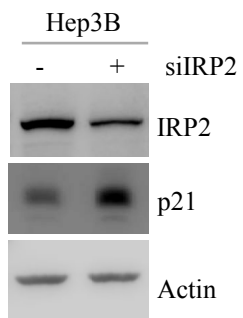

F

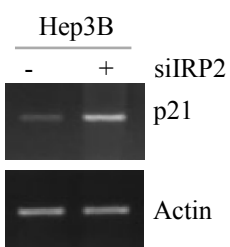

Supplement: NIHMS1561094-supplement-Supplemental_Figure_S2.pdf [file NIHMS1561094-supplement-Supplemental_Figure_S2.pdf]

Supplemental Figure S3

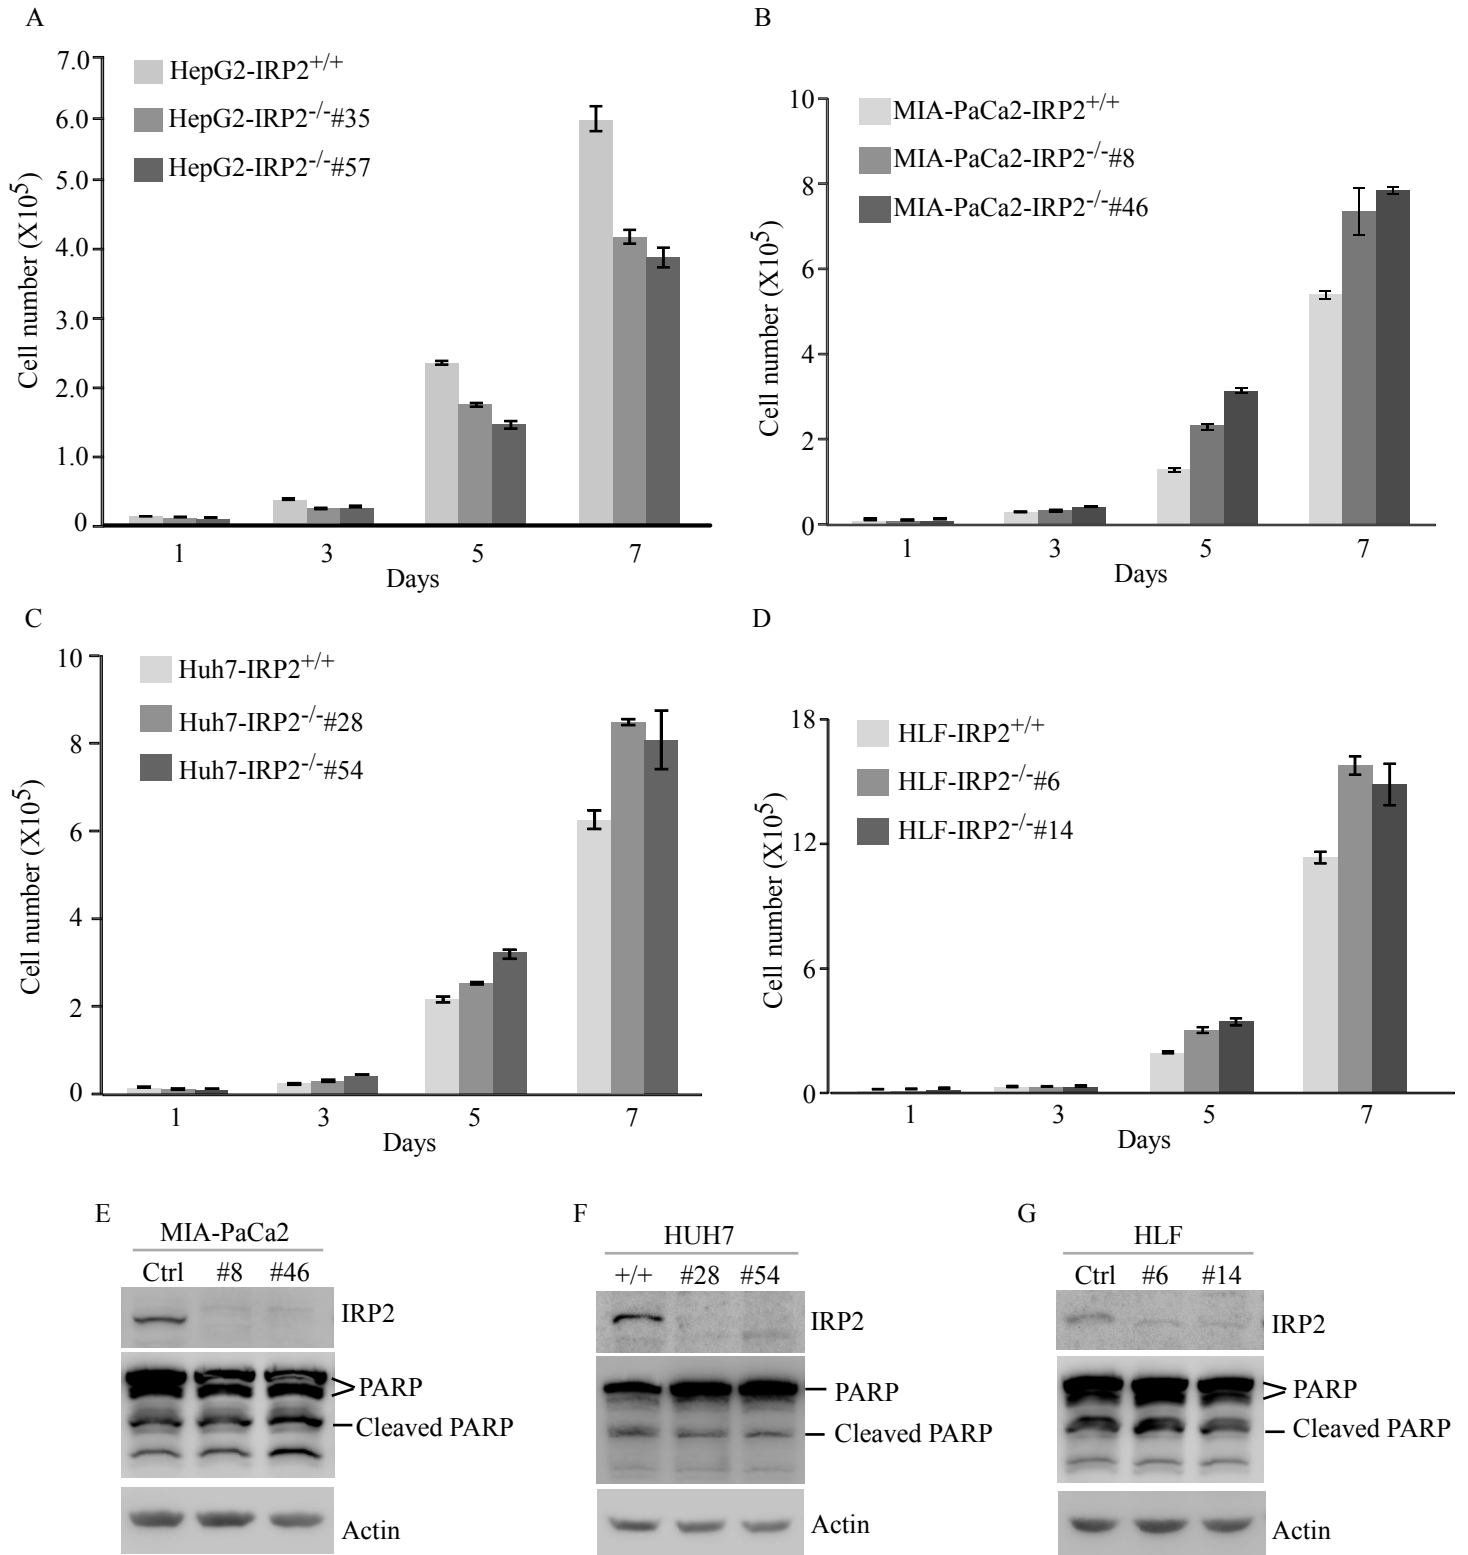

Supplement: NIHMS1561094-supplement-Supplemental_Figure_S3.pdf [file NIHMS1561094-supplement-Supplemental_Figure_S3.pdf]

Supplemental Figure S4

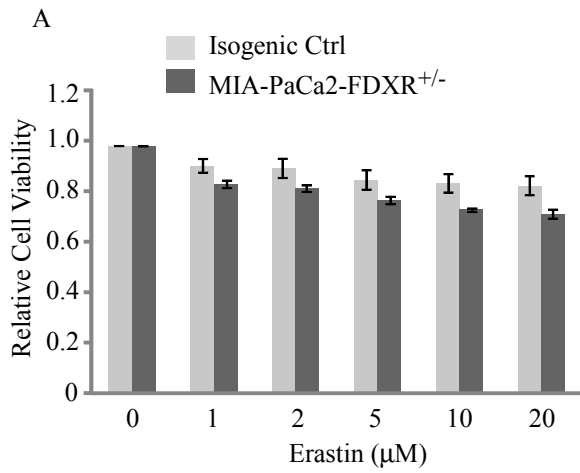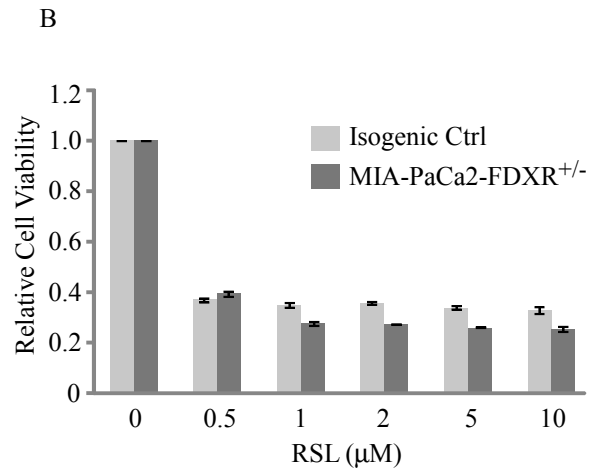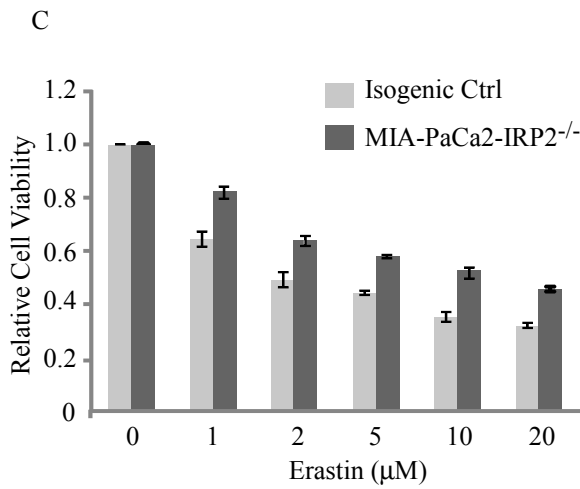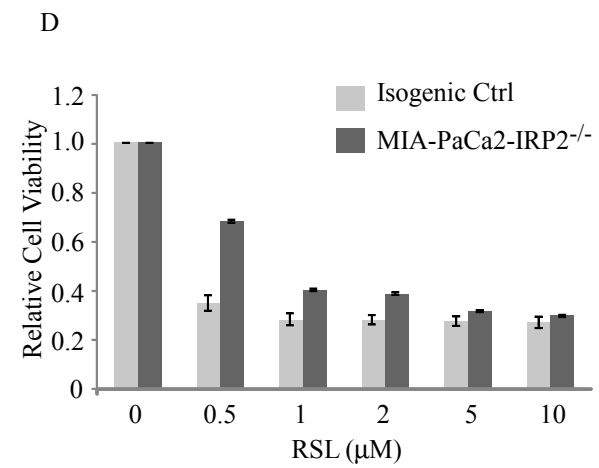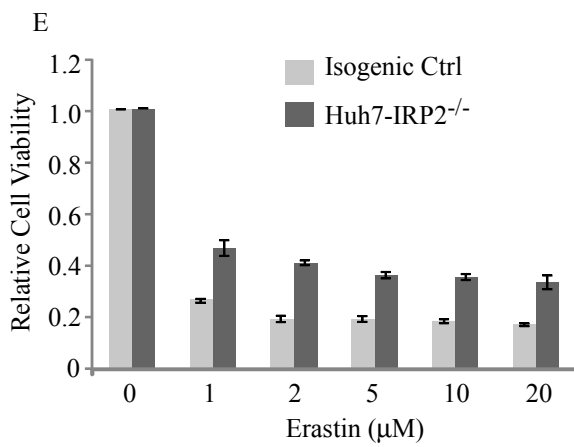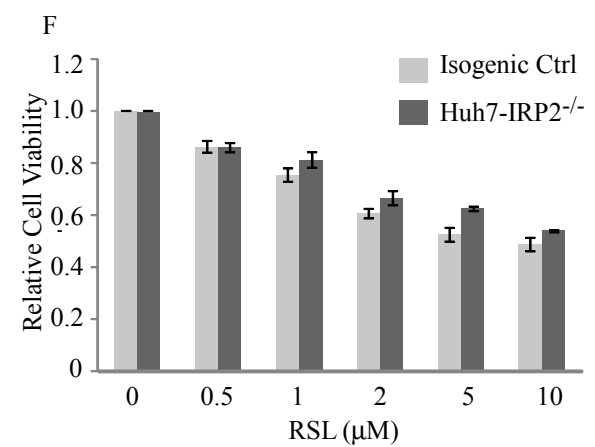

Supplement: NIHMS1561094-supplement-Supplemental_Figure_S4.pdf [file NIHMS1561094-supplement-Supplemental_Figure_S4.pdf]
